# Supplementary material
Source: publisher figshare collection journal article supplement (https://acs.figshare.com/ndownloader/files/5059942)
Supplement: Supplementary file 1 [file 5059942]

## Supporting Information

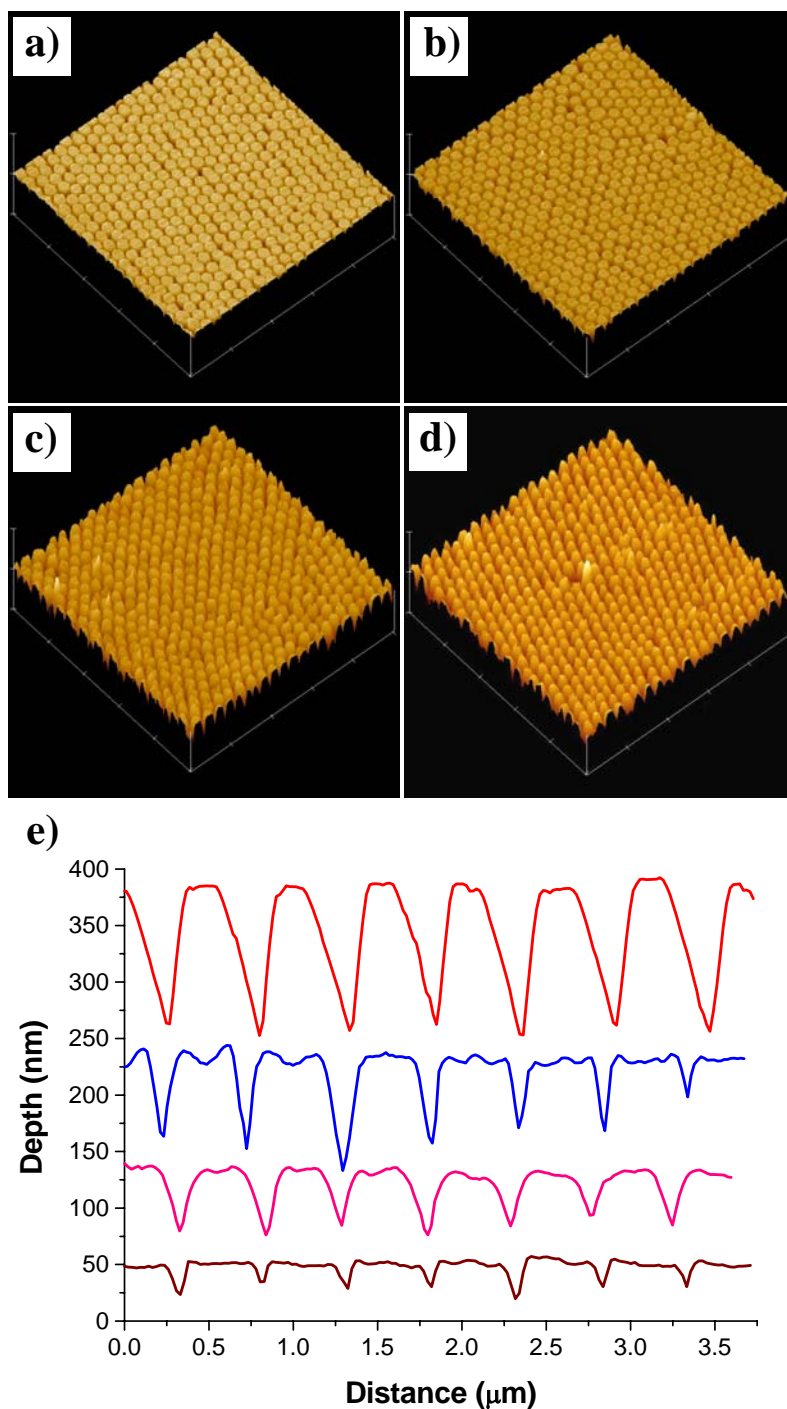

**Figure S1.** Contact mode AFM images and depth profiles of silicon nanopillar arrays etched under the same RIE conditions but different time. a) 4 min. b) 8 min. c) 12 min. d) 16 min. The corresponding depth profiles (from bottom to top with increasing etch time) are shown in e) and have been vertically offset for clarity.
